# Supplementary material for: Taenia crassiceps-Excreted/Secreted Products Induce a Defined MicroRNA Profile that Modulates Inflammatory Properties of Macrophages
Source: J Immunol Res. 2019 May 14;2019:2946713. doi: 10.1155/2019/2946713 (PMC6536978; doi:10.1155/2019/2946713)
Supplement: Supplementary Materials — Table S1: sequence of primers used in RT-qPCRs to amplify the specified mRNAs (A) or microRNAs (B). Table S2: mRNAs commonly upregulated (≥2-fold change) in BMDM with TcES (MTcES), LPS (MLPS), or TcES+LPS (MTcES+LPS) at both 4 (left) or 24 h (right) poststimulus. Table S3: transcripts up (A) or downregulated (B) at 4 or 24 h poststimulus with LPS (MLPS). Table S4: transcripts up (A) or downregulated (B) at 4 or 24 h poststimulus with TcES (MTcES). Table S5: transcripts up- (A) or downregulated (B) at 4 or 24 h poststimulus with TcES+LPS (MTcES+LPS). Table S6: mRNAs expressed differently (≥2 FC) between BMDM stimulated with TcES+LPS (MTcES+LPS) and with LPS (MLPS) at 4 (left) or 24 h (right). Table S7: microRNAs up- (A) or downregulated (B) at 4 or 24 h poststimulus with LPS (MLPS). Table S8: microRNAs up- (A) or downregulated (B) at 4 or 24 h poststimulus with TcES (MTcES). Table S9: microRNAs up- (A) or downregulated (B) at 4 (left) or 24 h (right) poststimulus with TcES+LPS (MTcES+LPS). Table S10: microRNAs upregulated (≥2-fold change) in BMDM with TcES (MTcES), LPS (MLPS), and TcES+LPS (MTcES+LPS) at both 4 (left) or 24 h (right) poststimulus. Table S11: microRNAs expressed differently (≥2 FC) between BMDM with TcES+LPS (MTcES+LPS) and with LPS (MLPS) at 4 (left) or 24 h (right) poststimulus. Table S12: KEGG pathway analysis. Significantly enriched KEGG pathways (p < 0.05) are presented for BMDM with TcES (MTcES), TcES+LPS (MTcES+LPS), or LPS (MLPS) at 4 (left) or 24 h (right) poststimulus. Table S13: GO biological process annotations of the target genes of differentially expressed microRNAs. According to p value, GO terms of biological process are shown in BMDM with TcES (MTcES), TcES+LPS (MTcES+LPS), or LPS (MLPS) at 4 (left) or 24 h (right) poststimulus. [file 2946713.f1.xlsx]

## Sheet: Table S1
Table S1: Sequence of primers used in RT-qPCRs to amplify the specified mRNAs (A) or microRNAs (B).
	mRNA	Name	Sequence(5'-3')
	Il10	RNA	TCTCCTAGCCAATAAAGTATAGAGC[G/A]CCAGCAGGATCTTATAAGTTTCTCA
	Il6	RNA	GATCCAGGCAGCAACAAAAAGTGGG[T/C]AAATGTAAAGAATGTTATGTAAATT
	Tnf	RNA	ATCAAGAGCCCCTGCCAGAGGGAGA[A/C]CCCAGAGGGGGCTGAGGCCAAGCCC
	Nos2	RNA	CTCTAACAGGCTGCTATGTCTGCAT[C/T]TGCCTGGACCAGGGAGGAAGGGGCT
	Arg1	RNA	TTGACTGACTGGAGAGCTCAAGTGC[A/C]GCAAAGAGAAGTGTCAGAGCATGAG
	Il1b	RNA	CAGGTGCATCGTGCACATAAGCCTC[G/T]TTATCCCATGTGTCGAAGAAGATAG
	Stat1	RNA	TGTGAAAGATGTAATAAAATACACA[T/C]TTTCCCCCTACCAGATCCATGATGG
	Stat6	RNA	AGATGCAGCAGGCAGGGCCCTCTC[AT/-]ACACTGGAGGGCCACATGGCCAGGC
	Il12b	RNA	AAGTGGGGTGAAAGGAGTCTGGGGC[G/A]GTACAAAAGGGCCTCTGGAACCTTG
	Cd86	RNA	GAATAGTTAACCAAGTGCTAAATCC[G/A]TGTTTTCAAAATGTGGTCAGGTACC
	Chi3l3	RNA	CAGGGTCCCAGGACACTGCCCTGAG[G/T]CTGAAGTCCCTCTTTACCTGTCCTC
	microRNA	miRBase Accession Number	Mature Sequence
	mmu-miR-125a-5p	MIMAT0000135	UCCCUGAGACCCUUUAACCUGUGA
	mmu-miR-155-5p	MIMAT0000165	UUAAUGCUAAUUGUGAUAGGGGU
	mmu-miR-484	MIMAT0003127	UCAGGCUCAGUCCCCUCCCGAU
	mmu-miR-762	MIMAT0003892	GGGGCUGGGGCCGGGACAGAGC

## Sheet: Table S2
Table S2. mRNAs commonly upregulated (≥2-fold change) in BMDM with TcES (MTcES), LPS (MLPS) or TcES+LPS (MTcES+LPS) at both 4 (left) or 24 h (right) post-stimulus.
	Commonly shared mRNA
	4 h										24 h
		Normalized counts					FC					Normalized counts					FC
							(compared to M0)										(compared to M0)
	Gene	M0	MTcES	MTcES+LPS	MLPS		MTcES	MTcES+LPS	MLPS		Gene	M0	MTcES	MTcES+LPS	MLPS		MTcES	MTcES+LPS	MLPS
	Cytokines										Cytokines
	Tnf	35.2796	87.9879	7741.21	6999.17		2.49402	219.425	198.392		Il1a	11.6909	40.839	8981.64	7999.59		3.49324	768.261	684.259
	Chemokines										Il7	1	2.31142	22.4438	16.4291		2.31142	22.4438	16.4291
	Ccl3	244.856	515.594	103665	91974.1		2.1057	423.372	375.625		Il10	1	2.31142	23.4912	8.01777		2.31142	23.4912	8.01777
	Ccl4	10.7836	42.388	13755	14248.1		3.93078	1275.54	1321.27		Chemokines
	Ccl5	29.836	60.4559	69902.2	65071.5		2.02627	2342.88	2180.97		Ccl2	276.61	682.692	5384.98	6051.53		2.46807	19.4678	21.8775
	Receptors										Ccl4	10.7836	62.9718	265.434	243.534		5.83959	24.6145	22.5837
	Ager	1	3.67117	55.2656	63.4278		3.67117	55.2656	63.4278		Ccl7	18.9489	71.9889	317.802	314.189		3.7991	16.7715	16.5808
	Cd40	5.34007	20.8787	21579.2	20087.7		3.90981	4040.99	3761.69		Ccl8	1	2.31142	119.849	106.43		2.31142	119.849	106.43
	Cxcr2	1	6.25229	17.8525	3.40064		6.25229	17.8525	3.40064		Ccl17	1	4.77063	5.68592	4.65325		4.77063	5.68592	4.65325
	Il1r1	1	4.53154	35.7457	20.3648		4.53154	35.7457	20.3648		Cxcl5	1	2.31142	28.7281	18.1113		2.31142	28.7281	18.1113
	Il23r	1	5.39192	38.999	13.8401		5.39192	38.999	13.8401		Receptors
	Ltb4r1	0.803782	12.2749	94.3053	69.9525		15.2714	117.327	87.0291		Cd55	1	3.9509	24.5386	17.2702		3.9509	24.5386	17.2702
	Nod2	1.71104	6.25229	328.544	310.061		3.65409	192.014	181.212		Il1r1	1	2.31142	21.3965	21.4758		2.31142	21.3965	21.4758
	Ptgir	9.87636	38.0861	27.6124	26.8895		3.8563	2.79581	2.72261		Nod1	5.34007	19.5259	51.7702	61.0089		3.65648	9.69466	11.4247
	Transcriptional factors										Nod2	1.71104	5.59037	80.0492	75.3081		3.26723	46.7839	44.0131
	Maff	4.43281	14.856	141.478	145.639		3.35138	31.9161	32.8547		Transcriptional factors
	Enzymes										Elk1	1	12.1482	4.63855	9.70003		12.1482	4.63855	9.70003
	Iigp1	1.71104	14.856	5151.58	4775.56		8.68246	3010.79	2791.03		Irf3	1	5.59037	3.59118	15.5879		5.59037	3.59118	15.5879
	Mapkapk5	1	2.81079	52.0122	38.634		2.81079	52.0122	38.634		Enzymes
	Mmp9	1.71104	6.25229	19.4791	6.01051		3.65409	11.3844	3.51278		Iigp1	1.71104	3.9509	600.592	681.762		2.30906	351.01	398.449
	Nox1	1	3.67117	32.4924	42.5488		3.67117	32.4924	42.5488		Mmp3	1	12.1482	2.54381	2.971		12.1482	2.54381	2.971
	Complement proteins										Mmp9	1.71104	10.5088	44.4386	30.7283		6.14175	25.9717	17.9588
	C1ra	2.6183	10.5542	30.8657	26.8895		4.03093	11.7885	10.2698		Pla2g4a	12.5981	51.4955	219.349	186.337		4.08756	17.4113	14.7909
	Cfb	0.803782	3.67117	1760	1813.35		4.56737	2189.65	2256.02		Complement proteins
	Anti-viral proteins										C1ra	2.6183	20.3456	68.5281	74.467		7.77055	26.1728	28.441
	Ifit1	38.9086	102.614	30851.1	29157		2.63732	792.912	749.372		C1s	1	8.04957	41.2965	19.7936		8.04957	41.2965	19.7936
	Ifit3	110.582	235.972	22381.1	19762.8		2.13391	202.394	178.716		C2	1	16.2469	25.5859	14.7468		16.2469	25.5859	14.7468
	Mx1	132.356	307.383	16684.6	16954.5		2.3224	126.058	128.098		Anti-viral proteins
	Mx2	3.52555	20.0183	3897.43	3864.71		5.67805	1105.48	1096.2		Mx2	3.52555	8.86931	607.923	631.295		2.51572	172.433	179.062
	Anti-apoptotic proteins										Other
	Hsh2d	1	8.83342	16.2258	30.8043		8.83342	16.2258	30.8043		Hras1	1	3.9509	9.8754	5.49438		3.9509	9.8754	5.49438
	Other
	Myl2	1.71104	6.25229	8.09255	7.31545		3.65409	4.72961	4.27544
	FC-Fold Change

## Sheet: Table S3
Table S3. Transcripts up (A) or downregulated (B) at 4 or 24 h post-stimulus with LPS (MLPS).
(A)	mRNA overexpressed in MLPS
	4 h post-stimulus					24 h post-stimulus
	Normalized counts			FC		Normalized counts			FC
				(compared to M0)					(compared to M0)
	Gene	M0	MLPS	MLPS		Gene	M0	MLPS	MLPS
	Cytokines					Cytokines
	Il6	1	5140.94	5140.94		Il12a	1	252.786	252.786
	Il1a	11.6909	49078.2	4197.99		Il6	1	165.309	165.309
	Il12b	1	957.31	957.31		Il12b	1	95.4952	95.4952
	Il12a	1	739.386	739.386		Il3	1	71.1025	71.1025
	Ifnb1	1	244.814	244.814		Il1b	719.352	44290.1	61.5695
	Il10	1	199.141	199.141		Ifnb1	1	30.7283	30.7283
	Il3	1	192.617	192.617		Tnf	35.2796	368.021	10.4316
	Il1b	719.352	138468	192.49		Il15	41.6304	182.132	4.37497
	Il15	41.6304	5850.83	140.542		Il18	82.457	299.048	3.62672
	Il23a	1	33.4142	33.4142		Tnfaip3	459.876	1499.34	3.26031
	Csf2	1	20.3648	20.3648		Cytokine receptors
	Il18	82.457	1415.34	17.1646		Il23r	1	215.777	215.777
	Csf1	177.719	2981.27	16.7752		Il1rn	108.767	1135.13	10.4363
	Il7	1	16.45	16.45		Chemokines
	Cytokine receptors					Ccl5	29.836	89728.8	3007.4
	Il1rn	108.767	1690.69	15.544		Cxcl3	1	823.072	823.072
	Il1rap	131.449	419.676	3.19269		Cxcl9	1	332.694	332.694
	Chemokines					Cxcl10	29.836	1354.67	45.4037
	Cxcl3	1	2285.74	2285.74		Ccl22	8.9691	401.666	44.7833
	Cxcl10	29.836	66103.7	2215.57		Cxcl1	44.3521	839.895	18.937
	Cxcl9	1	1699.82	1699.82		Ccl3	244.856	3527.3	14.4056
	Ccl22	8.9691	4844.72	540.157		Cxcl2	47.9812	676.716	14.1038
	Cxcl1	44.3521	13364.7	301.331		Chemokine receptors
	Cxcl2	47.9812	10504.2	218.924		Cxcr1	4.43281	776.81	175.241
	Ccl7	18.9489	4018.69	212.08		Ccr7	1	90.4484	90.4484
	Ccl17	1	188.702	188.702		Receptor
	Ccl2	276.61	40108.1	144.999		Cd40	5.34007	685.127	128.299
	Ccl8	1	131.285	131.285		Ager	1	13.9057	13.9057
	Ccl20	1	24.2796	24.2796		Tlr1	223.989	2779.54	12.4093
	Ccl24	33.4651	533.205	15.9332		Cxcr2	1	7.17664	7.17664
	Cxcl5	1	2.0957	2.0957		Ptgir	9.87636	50.9154	5.15528
	Chemokine receptors					Tlr3	24.3925	118.206	4.84599
	Cxcr1	4.43281	2313.14	521.822		Traf2	70.6626	340.264	4.81533
	Receptors					Cysltr1	219.453	708.678	3.2293
	Ccr3	17.1344	39.9389	2.33092		Ptger1	1	2.971	2.971
	Cd55	1	4.70557	4.70557		Cysltr2	8.9691	26.5226	2.95711
	Cd86	159.574	1004.29	6.29356		Ccr1	128.727	287.273	2.23164
	Cysltr2	8.9691	22.9747	2.56154		Ccr4	1	2.12987	2.12987
	Ly96	690.319	1647.62	2.38675		Tlr9	53.4247	108.953	2.03938
	Nod1	5.34007	303.536	56.8413		Tlr6	295.662	596.808	2.01855
	Ptger1	1	4.70557	4.70557		Transcriptional factor
	Ptger4	86.9932	295.707	3.39919		Cebpb	1696.47	4240.58	2.49965
	Ptgfr	1	8.62039	8.62039		Ddit3	204.937	758.305	3.70019
	Tlr1	223.989	2317.06	10.3445		Hif1a	1866.13	5984.24	3.20677
	Tlr2	404.533	3422.34	8.45996		Irf1	675.803	1416.07	2.09539
	Tlr3	24.3925	324.415	13.2998		Irf7	113.304	7850.71	69.2891
	Tlr6	295.662	1331.83	4.50455		Mafg	23.4852	90.4484	3.85129
	Tlr7	316.529	1205.25	3.8077		Stat1	242.134	3753.57	15.502
	Tlr9	53.4247	120.845	2.26197		Stat2	139.614	1426.16	10.215
	Traf2	70.6626	484.923	6.86251		Stat3	590.521	1214.2	2.05615
	Transcriptional factor					Inflammatory related proteins
	Irf7	113.304	4702.48	41.5033		Oasl1	33.4651	4271.7	127.647
	Irf1	675.803	21990.3	32.5395		Ltb4r1	1	21.4758	21.4758
	Stat2	139.614	2695.49	19.3067		Lta	1	3.81213	3.81213
	Stat1	242.134	3469.32	14.3281		Myd88	295.662	686.809	2.32295
	Nfkb1	451.711	4327.96	9.58127		Nlrp3	113.304	251.104	2.2162
	Mafk	60.6828	370.088	6.09874		Enzymes
	Stat3	590.521	3140.47	5.31814		Ptgs2	4.43281	640.547	144.501
	Cebpb	1696.47	7491.13	4.41572		Arg1	1	39.9807	39.9807
	Relb	566.932	2224.4	3.92358		Nos2	21.6707	717.09	33.0903
	Rela	462.598	1774.2	3.8353		Mapkapk5	1	18.9525	18.9525
	Nr3c1	551.509	2015.61	3.65473		Oas1a	469.856	5426.57	11.5494
	Max	174.09	629.771	3.6175		Oas2	42.5376	411.76	9.6799
	Hif1a	1866.13	6550.27	3.51009		Nox1	1	8.8589	8.8589
	Irf5	1036.89	3041.3	2.93309		Flt1	1	2.971	2.971
	Bcl6	52.5175	132.589	2.52467		Ptk2	72.4771	213.253	2.94235
	Tcf4	858.162	2156.55	2.51298		Mapkapk2	360.985	862.605	2.38959
	Inflammatory related proteins					Map2k1	1115.82	2237.01	2.00481
	Ptgs2	4.43281	24080.8	5432.4		Complement proteins
	Oasl1	33.4651	16894.5	504.841		Cfb	1	17948.5	17948.5
	Tslp	1	29.4994	29.4994		C3	89.715	2762.72	30.7944
	Nlrp3	113.304	2969.52	26.2085		C4a	1.71104	11.3823	6.65226
	Myd88	295.662	1941.23	6.56571		C8a	1	4.65325	4.65325
	Enzymes					C9	1	2.12987	2.12987
	Nos2	21.6707	1667.2	76.9332		Anti-apoptotic proteins
	Tnfaip3	459.876	17487	38.0254		Hsh2d	1	8.8589	8.8589
	Pla2g4a	12.5981	467.958	37.1451		Anti-viral proteins
	Ripk2	58.8683	1560.19	26.5031		Ifit1	38.9086	4153.1	106.74
	Oas2	42.5376	697.628	16.4002		Ifit2	251.207	23439.4	93.307
	Oas1a	469.856	6466.76	13.7633		Ifit3	110.582	8825.58	79.8103
	Flt1	1	9.92533	9.92533		Mx1	132.356	3067.2	23.1739
	Arg1	1	9.92533	9.92533		Others
	Mapkapk2	360.985	3174.4	8.79372		Ifi44	626.811	19276.6	30.7534
	Map2k1	1115.82	3995.21	3.5805		Daxx	46.1667	251.945	5.4573
	Map2k4	491.63	1577.16	3.20801		Fxyd2	1	3.81213	3.81213
	Map3k5	232.154	537.12	2.31363		Rapgef2	187.699	660.734	3.52018
	Complement proteins					Prkcb	366.429	1134.29	3.09553
	C3	89.715	2563.69	28.5759		Ifi27l2a	2205.44	6384.62	2.89494
	Immune proteins					Keap1	127.82	290.637	2.2738
	Chi3l3	24.3925	55.5981	2.27932
	Others
	Ifi44	626.811	29527.6	47.1077
	Daxx	46.1667	1625.44	35.2081
	Rapgef2	187.699	1744.19	9.29248
	Kng1	4.43281	22.9747	5.18287
	Birc2	300.199	1109.99	3.69751
	Keap1	127.82	458.824	3.58961
	Ifi27l2a	2205.44	5259.69	2.38487
	Gnb1	3558.16	7253.64	2.03859
	FC- Fold Change
(B)
	mRNA downexpressed in MLPS
	4 h post-stimulus					24 h post-stimulus
	Normalized counts			FC		Normalized counts			FC
				(compared to M0)					(compared to M0)
	Gene	M0	MLPS	MLPS		Gene	M0	MLPS	MLPS
	Cytokines					Transcriptional factor
	Ifna1	5.34007	1	0.187263		Maff	4.43281	1	0.22559
	Enzymes
	Ptgs1	44.3521	17.755	0.400318
	FC- Fold Change

## Sheet: Table S4
Table S4. mRNAs upregulated (A) or downregulated (B) in BMDM stimulated with TcES (MTcES) at 4 (left) or 24 h (right) post-stimulus.
(A)	mRNAs overexpressed in MTcES
	4 h post-stimulus					24 h post-stimulus
	Normalized counts			FC		Normalized counts			FC
				(compared to M0)					(compared to M0)
	mRNAs	M0	MTcES	MTcES		mRNAs	M0	MTcES	MTcES
	Cytokines					Cytokines
	Ifna1	5.34007	14.856	2.78199		Ifna1	5.34007	19.5259	3.65648
	Chemokines					Transcriptional factors
	Ccl21a	1	6.25229	6.25229		Maff	4.43281	8.86931	2.00083
	Transcription factors					Enzymes
	Irf3	1	8.83342	8.83342		Prkca	1	12.1482	12.1482
	Mafg	23.4852	72.5011	3.0871		Alox5	1	8.86931	8.86931
	Inflammatory related proteins					Map2k6	2.6183	13.7877	5.26591
	Defa1	1	7.97304	7.97304		Plcb1	1.71104	8.86931	5.18358
	Enzymes					Defa1	1	3.13116	3.13116
	Ptgs1	44.3521	91.4294	2.06144		Map3k9	1	3.13116	3.13116
	Complement proteins					Myl2	1.71104	3.9509	2.30906
	C1s1	1	6.25229	6.25229		Anti-viral proteins
	Anti-viral proteins					Hspb1	1	4.77063	4.77063
	Hspb1	1	4.53154	4.53154
	Others
	Prkca	1	7.97304	7.97304
	Mbl2	1	4.53154	4.53154
	FC- Fold Change
(B)	mRNAs downexpressed in MTcES
	4 h post-stimulus				24 h post-stimulus
	Normalized counts			FC		Normalized counts			FC
				(compared to M0)					(compared to M0)
	mRNAs	M0	MTcES	MTcES		mRNAs	M0	MTcES	MTcES
	Cytokines					Cytokines
	Tnfsf14	11.6909	5.39192	0.461208		Il1b	719.352	313.811	0.436241
	Il12b	1	0.229671	0.229671		Chemokines
	Il23a	1	0.229671	0.229671		Cxcl2	47.9812	21.1653	0.441118
	Il1b	719.352	106.916	0.148628		Cxcl10	29.836	1	0.0335165
	Chemokines					Ccl24	33.4651	8.86931	0.265032
	Cxcl1	44.3521	20.0183	0.451349		Receptors
	Receptors					Cd86	159.574	44.9377	0.28161
	Cxcr1	4.43281	1	0.22559		Tlr2	404.533	99.8599	0.246852
	Transcriptional factors					Transcription factors
	Elk1	1	0.229671	0.229671		Cebpb	1696.47	590.881	0.348301
	Inflammatory related proteins					Relb	566.932	265.446	0.468215
	Lta	1	0.229671	0.229671		Inflammatory related proteins
	Enzymes					Nlrp3	113.304	53.9548	0.476196
	Flt1	1	0.229671	0.229671		Enzymes
	Complementary proteins					Nos2	21.6707	7.22984	0.333623
	C2	1	0.229671	0.229671		Others
	Others					Ifit1	38.9086	11.3285	0.291157
	Kng1	4.43281	1.95042	0.439996
	FC- Fold Change

## Sheet: Table S5
Table S5. Transcripts up (A) or downregulated (B) at 4 or 24 h post-stimulus with TcES+LPS (MTcES+LPS).
	mRNA overexpressed in MTcES+LPS
	4 h post-stimulus					24 h post-stimulus
	Normalized counts			FC		Normalized counts			FC
				(compared to M0)					(compared to M0)
	Gene	M0	MTcES+LPS	MTcES+LPS		Gene	M0	MTcES+LPS	MTcES+LPS
	Cytokines					Cytokines
	Il6	1	5974.66	5974.66		Il12a	1	338.749	338.749
	Il1a	11.6909	41578.9	3556.53		Il6	1	194.212	194.212
	Il12a	1	626.222	626.222		Il12b	1	99.9492	99.9492
	Il12b	1	582.302	582.302		Il3	1	82.1439	82.1439
	Ifnb1	1	291.131	291.131		Il1b	719.352	43835	60.9368
	Il10	1	287.877	287.877		Ifnb1	1	21.3965	21.3965
	Il3	1	188.651	188.651		Tnf	35.2796	401.592	11.3831
	Il1b	719.352	117249	162.993		Tnfaip3	459.876	1755.84	3.81807
	Il15	41.6304	5982.8	143.712		Il15	41.6304	153.365	3.68397
	Il23a	1	19.4791	19.4791		Il18	82.457	256.007	3.10474
	Il18	82.457	1577.81	19.135		Il2	1	2.54381	2.54381
	Csf1	177.719	3380.15	19.0196		Il5	1	2.54381	2.54381
	Il17a	1	16.2258	16.2258		Cytokine receptors
	Il7	1	16.2258	16.2258		Il23r	1	206.781	206.781
	Csf2	1	11.3459	11.3459		Il1rn	108.767	1069.81	9.83579
	Tnfsf14	11.6909	42.2523	3.61413		Chemokines
	Ifna1	5.34007	12.9725	2.42928		Ccl5	29.836	80194.4	2687.84
	Cytokine receptors					Cxcl3	1	1205.97	1205.97
	Il1rn	108.767	1415.15	13.0108		Cxcl9	1	409.971	409.971
	Il1rap	131.449	448.916	3.41514		Cxcl10	29.836	1158.84	38.8403
	Chemokines					Ccl22	8.9691	340.844	38.0021
	Cxcl3	1	2527.78	2527.78		Cxcl1	44.3521	1399.73	31.5596
	Cxcl10	29.836	61463.1	2060.03		Cxcl2	47.9812	956.697	19.939
	Cxcl9	1	1285.02	1285.02		Ccl3	244.856	4687.43	19.1436
	Ccl22	8.9691	5981.17	666.864		Chemokine receptors
	Cxcl1	44.3521	13942	314.348		Cxcr1	4.43281	778.645	175.655
	Cxcl2	47.9812	11523.2	240.161		Ccr7	1	68.5281	68.5281
	Ccl7	18.9489	4372.41	230.747		Receptor
	Ccl17	1	182.145	182.145		Cd40	5.34007	831.013	155.618
	Ccl8	1	174.011	174.011		Ager	1	20.3491	20.3491
	Ccl2	276.61	47309.6	171.034		Tlr1	223.989	2895.38	12.9264
	Ccl20	1	14.5992	14.5992		Ptgir	9.87636	62.2439	6.30231
	Ccl24	33.4651	466.809	13.9492		Traf2	70.6626	355.507	5.03105
	Cxcl5	1	9.7192	9.7192		Tlr3	24.3925	87.3807	3.58228
	Chemokine receptors					Cysltr1	219.453	583.834	2.66041
	Cxcr1	4.43281	2010.51	453.551		Tlr2	404.533	975.55	2.41154
	Receptors					Tlr6	295.662	646.676	2.18721
	Nod1	5.34007	300.891	56.3458		Tlr9	53.4247	111.47	2.08649
	Ptgfr	1	24.3591	24.3591		Transcriptional factors
	Ccr7	1	21.1058	21.1058		Cebpb	1696.47	4187.83	2.46856
	Tlr3	24.3925	349.69	14.336		Irf7	113.304	7191.69	63.4727
	Tlr5	1	11.3459	11.3459		Stat1	242.134	3513.33	14.5098
	Tlr1	223.989	2529.41	11.2926		Stat2	139.614	1264.62	9.05799
	Tlr2	404.533	3925.08	9.70273		Mafg	23.4852	100.997	4.30043
	Traf2	70.6626	642.488	9.09234		Ddit3	204.937	859.292	4.19296
	Cd55	1	8.09255	8.09255		Maff	4.43281	14.0649	3.1729
	Cd86	159.574	1119.1	7.01304		Hif1a	1866.13	5799.73	3.1079
	Tlr6	295.662	1618.48	5.47408		Irf1	675.803	1592.45	2.35638
	Cysltr2	8.9691	43.879	4.89224		Inflammatory related proteins
	Tlr7	316.529	1496.48	4.72778		Oasl1	33.4651	4026.54	120.321
	Ptger4	86.9932	401.743	4.6181		Ltb4r1	1	29.7754	29.7754
	Tlr9	53.4247	222.811	4.17056		Lta	1	11.9701	11.9701
	Ly96	690.319	1566.43	2.26914		Areg	1	2.54381	2.54381
	Transcriptional factors					Nlrp3	113.304	252.865	2.23175
	Irf7	113.304	5034.46	44.4333		Enzymes
	Irf1	675.803	25450.6	37.6598		Ptgs2	4.43281	914.803	206.371
	Stat2	139.614	2469.22	17.686		Nos2	21.6707	448.723	20.7064
	Stat1	242.134	3679.45	15.1959		Oas1a	469.856	5380.79	11.452
	Elk1	1	12.9725	12.9725		Mapkapk5	1	9.8754	9.8754
	Irf3	1	11.3459	11.3459		Oas2	42.5376	398.45	9.36699
	Nfkb1	451.711	4432.6	9.81291		Arg1	1	6.73329	6.73329
	Mafk	60.6828	413.13	6.80802		Map2k6	2.6183	7.78066	2.97165
	Stat3	590.521	3123.14	5.28878		Ptk2	72.4771	193.165	2.66519
	Cebpb	1696.47	8634.25	5.08954		Mapkapk2	360.985	857.197	2.37461
	Max	174.09	722.194	4.1484		Complement proteins
	Rela	462.598	1914.53	4.13865		Cfb	1	19872.2	19872.2
	Relb	566.932	2218.72	3.91355		C3	89.715	2816.83	31.3975
	Hif1a	1866.13	6838.42	3.6645		C4a	1.71104	10.9228	6.3837
	Nr3c1	551.509	2008.88	3.64251		Anti-apoptotic proteins
	Mafg	23.4852	81.292	3.46141		Hsh2d	1	23.4912	23.4912
	Irf5	1036.89	3428.95	3.30695		Anti-viral proteins
	Tcf4	858.162	2269.14	2.64419		Ifit1	38.9086	4186.79	107.606
	Bcl6	52.5175	112.198	2.1364		Ifit2	251.207	24552.9	97.7397
	Inflammatory related proteins					Ifit3	110.582	9369.17	84.726
	Ptgs2	4.43281	27069.1	6106.54		Mx1	132.356	2876.53	21.7332
	Oasl1	33.4651	19093.6	570.555		Hspb1	1	5.68592	5.68592
	Nlrp3	113.304	3093.86	27.3059		Others
	Tslp	1	25.9858	25.9858		Ifi44	626.811	18743.1	29.9023
	Lta	1	8.09255	8.09255		Daxx	46.1667	236.107	5.11424
	Myd88	295.662	2036.53	6.88803		Rapgef2	187.699	656.102	3.49551
	Defa-rs1	1	6.46589	6.46589		Prkcb	366.429	1040.49	2.83954
	Ltb	20.7634	52.0122	2.50499		Keap1	127.82	333.513	2.60924
	Enzymes					Ifi27l2a	2205.44	5327.37	2.41556
	Nos2	21.6707	1746.99	80.6152
	Pla2g4a	12.5981	518.862	41.1857
	Tnfaip3	459.876	18595.9	40.4367
	Ripk2	58.8683	1828.32	31.0578
	Oas2	42.5376	772.621	18.1632
	Oas1a	469.856	6735.94	14.3362
	Mapkapk2	360.985	3969	10.9949
	Plcb1	1.71104	14.5992	8.53234
	Masp1	1	4.83924	4.83924
	Map2k1	1115.82	3978.76	3.56576
	Map2k4	491.63	1657.52	3.37148
	Arg1	1	3.21258	3.21258
	Map3k5	232.154	570.915	2.4592
	Complement proteins
	C3	89.715	3210.98	35.7909
	C2	1	29.2391	29.2391
	C1s	1	4.83924	4.83924
	Anti-viral proteins
	Hspb1	1	12.9725	12.9725
	Pro-apoptotic proteins
	Bcl2l1	135.078	269.984	1.99873
	Others
	Ifi44	626.811	32324.9	51.5703
	Daxx	46.1667	1706.32	36.96
	Gngt1	1	12.9725	12.9725
	Rapgef2	187.699	1613.6	8.59676
	Kng1	4.43281	29.2391	6.59605
	Keap1	127.82	549.769	4.30112
	Birc2	300.199	1169.52	3.89583
	Ifi27l2a	2205.44	6130.82	2.77986
	Gnb1	3558.16	7863.21	2.20991
	FC- Fold Change

## Sheet: Table S6
Table S6. mRNAs expressed differently (≥2 FC) between BMDM stimulated with TcES+LPS (MTcES+LPS) and with LPS (MLPS) at 4 (left) or 24 h (right).
	mRNA differently expressed between MTcES+LPS and MLPS
	4 h post-stimulus							24 h post-stimulus
	Normalized counts				FC			Normalized counts				FC
					(compared to M0)							(compared to M0)
	Gene	M0	MTcES+LPS	MLPS	MTcES+LPS	MLPS		Gene	M0	MTcES+LPS	MLPS	MTcES+LPS	MLPS
	Cytokines							Cytokines
	Il17a	1	16.2258	1	16.23	1		Il2	1	2.54381	1.28874	2.54	1.29
	Tnfsf14	11.6909	42.2523	22.9747	3.61	1.97		Il5	1	2.54381	1	2.54	1
	Ifna1	5.34007	12.9725	1	2.43	0.19		Chemokine
	Chemokine receptors							Ccl21a	1	1	2.12987	1	2.13
	Ccr3	17.1344	1	39.9389	0.06	2.33		Chemokine receptors
	Ccr7	1	21.1058	1	21.11	1		Cxcr2	1	1	7.17664	1	7.17664
	Receptors							Ccr1	128.727	240.297	287.273	1.86671	2.23164
	Ptger1	1	1	4.70557	1	4.71		Ccr4	1	1	2.12987	1	2.12987
	Tlr5	1	11.3459	1	11.35	1		Receptors
	Transcriptional factors							Cysltr2	8.9691	5.68592	26.5226	0.633946	2.95711
	Irf3	1	11.3459	1	11.35	1		Ptger1	1	1	2.971	1	2.97
	Elk1	1	12.9725	0.790761	12.97	0.79		Tlr2	404.533	975.55	802.044	2.41154	1.98264
	Mafg	23.4852	81.292	33.4142	3.46	1.42		Transcription factors
	Inflammatory related proteins							Maff	4.43281	14.0649	1	3.1729	0.22559
	Defa-rs1	1	6.46589	1	6.47	1		Stat3	590.521	1101.23	1214.2	1.86485	2.05615
	Lta	1	8.09255	1	8.09	1		Inflammatory related proteins
	Ltb	20.7634	52.0122	32.1093	2.5	1.55		Areg	1	2.54381	1	2.54	1
	Enzymes							Myd88	295.662	588.023	686.809	1.99	2.32
	Flt1	1	1	9.92533	1	9.93		Enzymes
	Masp1	1	4.83924	1	4.84	1		Flt1	1	1	2.971	1	2.971
	Plcb1	1.71104	14.5992	0.790761	8.53	0.46		Map2k1	1115.82	2197.83	2237.01	1.96969	2.00481
	Complement proteins							Map2k6	2.6183	7.78066	3.81213	2.97165	1.45596
	C1s	1	4.83924	1	4.84	1		Nox1	1	1	8.8589	8.85	1
	C2	1	29.2391	1	29.24	1		Complement proteins
	Immune proteins							C8a	1	1	4.65325	1	4.65325
	Chi3l3	24.3925	42.2523	55.5981	1.73	2.28		C9	1	1	2.12987	1	2.12987
	Anti-viral protein							Anti-viral proteins
	Hspb1	1	12.9725	1	12.97	1		Hspb1	1	5.68592	1	5.68592	1
	Pro-apoptotic proteins							Others
	Bcl2l1	135.078	269.984	191.312	2	1.42		Fxyd2	1	1	3.81213	1	3.81
	Others
	Gngt1	1	12.9725	1	12.97	1
	FC-Fold Change

## Sheet: Table S7
Table S7. microRNAs up (A) or downregulated (B) at 4 or 24 h post-stimulus with LPS (MLPS).
(A)
	microRNA upregulated in MLPS
	4 h post-stimulus					24 h post-stimulus
	Normalized counts			FC		Normalized counts			FC
				(compared to M0)					(compared to M0)
	microRNAs	M0	MLPS	MLPS		microRNAs	M0	MLPS	MLPS
	mmu-miR-155-5p	1	402.622	402.622		mmu-miR-155-5p	1	14139	14139
	mmu-miR-546	1	76.6682	76.6682		mmu-miR-1933-5p	1	901.352	901.352
	mmu-miR-146a-5p	2586.8	5416.24	2.0938		mmu-miR-210-3p	1	639.82	639.82
						mmu-miR-574-3p	1	579.107	579.107
						mmu-miR-673-3p	1	518.394	518.394
						mmu-miR-674-5p	1	331.585	331.585
						mmu-miR-466a-5p	1	308.234	308.234
						mmu-miR-489-3p	1	284.883	284.883
						mmu-miR-1900	1	261.532	261.532
						mmu-miR-1953	1	242.851	242.851
						mmu-miR-743a-3p	1	238.181	238.181
						mmu-miR-1982-3p	1	238.181	238.181
						mmu-miR-410-3p	1	233.511	233.511
						mmu-miR-3474	1	219.5	219.5
						mmu-miR-539-5p	1	205.49	205.49
						mmu-miR-1929-5p	1	205.49	205.49
						mmu-miR-362-5p	1	200.819	200.819
						mmu-miR-876-5p	1	186.809	186.809
						mmu-miR-1839-3p	1	182.138	182.138
						mmu-miR-7a-5p	1	158.787	158.787
						mmu-miR-544-3p	1	158.787	158.787
						mmu-miR-344-3p	1	154.117	154.117
						mmu-miR-467c-5p	1	154.117	154.117
						mmu-miR-882	1	149.447	149.447
						mmu-miR-1936	1	149.447	149.447
						mmu-miR-139-3p	1	144.777	144.777
						mmu-miR-200b-3p	1	144.777	144.777
						mmu-miR-501-3p	1	140.106	140.106
						mmu-miR-712-5p	1	140.106	140.106
						mmu-miR-141-3p	1	135.436	135.436
						mmu-miR-367-3p	1	135.436	135.436
						mmu-miR-467a-5p	1	135.436	135.436
						mmu-miR-1193-3p	1	135.436	135.436
						mmu-miR-298-5p	1	130.766	130.766
						mmu-miR-495-3p	1	130.766	130.766
						mmu-miR-380-3p	1	126.096	126.096
						mmu-miR-100-5p	1	121.426	121.426
						mmu-miR-411-5p	1	121.426	121.426
						mmu-miR-547-3p	1	121.426	121.426
						mmu-miR-764-5p	1	121.426	121.426
						mmu-miR-1892	1	121.426	121.426
						mmu-miR-335-3p	1	116.755	116.755
						mmu-miR-568	1	116.755	116.755
						mmu-miR-376a-3p	300.642	5006.47	16.6526
						mmu-miR-691	385.198	4371.32	11.3483
						mmu-miR-101b-3p	175.688	1919.46	10.9254
						mmu-miR-1955-5p	621.014	5800.41	9.34023
						mmu-miR-190b-5p	680.203	6314.13	9.28272
						mmu-miR-2183	166.293	1331.01	8.00403
						mmu-miR-1951	469.753	3680.13	7.83418
						mmu-miR-1902	545.853	4175.17	7.64889
						mmu-miR-222-3p	682.082	5081.19	7.44954
						mmu-miR-664-3p	168.172	1162.88	6.91486
						mmu-miR-377-3p	75.1605	476.362	6.33793
						mmu-miR-125a-5p	588.131	3301.84	5.61413
						mmu-miR-195-5p	126.833	635.149	5.00775
						mmu-miR-742-3p	101.467	495.043	4.87887
						mmu-let-7i-5p	4783.97	22823.3	4.7708
						mmu-miR-743b-5p	98.6482	457.681	4.63953
						mmu-miR-1981-5p	188.841	854.65	4.52577
						mmu-miR-193b-3p	701.811	3152.4	4.4918
						mmu-miR-466g	129.652	574.437	4.43061
						mmu-miR-99b-5p	143.744	625.809	4.35362
						mmu-let-7e-5p	532.7	2311.76	4.3397
						mmu-miR-3471	210.449	887.341	4.21641
						mmu-miR-136-5p	145.623	597.788	4.10502
						mmu-miR-496a-3p	142.805	574.437	4.02252
						mmu-miR-30a-5p	211.389	840.639	3.97674
						mmu-miR-30e-5p	96.7692	364.277	3.76439
						mmu-miR-741-3p	656.715	2433.18	3.70508
						mmu-miR-1949	124.015	439	3.5399
						mmu-miR-297c-5p	100.527	345.596	3.43784
						mmu-miR-188-5p	384.258	1232.94	3.20862
						mmu-let-7a-5p	6897.29	20815.9	3.01798
						mmu-miR-22-3p	21580.5	64187.4	2.97433
						mmu-miR-154-5p	559.946	1601.88	2.86078
						mmu-miR-99a-5p	1065.4	3030.97	2.84491
						mmu-miR-130a-3p	124.015	340.926	2.74907
						mmu-miR-374b-5p	155.019	415.649	2.68129
						mmu-miR-130b-3p	296.884	765.915	2.57985
						mmu-miR-98-5p	507.333	1251.62	2.46705
						mmu-miR-328-3p	118.378	284.883	2.40656
						mmu-miR-1839-5p	134.349	312.904	2.32903
						mmu-miR-101a-3p	379.561	868.66	2.28859
						mmu-let-7f-5p	5009.45	11325.3	2.26078
						mmu-let-7c-5p	3099.43	6888.57	2.22253
						mmu-miR-652-3p	251.788	546.415	2.17014
						mmu-miR-378-3p	510.152	1078.82	2.1147
						mmu-miR-21a-5p	23295.1	48957.9	2.10164
						mmu-miR-199a-3p	74.221	154.117	2.07646
	FC- Fold Change
(B)	microRNA downregulated in MLPS
	4 h post-stimulus					24 h post-stimulus
	Normalized counts			FC		Normalized counts			FC
				(compared to M0)					(compared to M0)
	microRNA	M0	MLPS	MLPS		microRNA	M0	MLPS	MLPS
	mmu-miR-762	350.246	155.81	0.444857		mmu-miR-338-3p	262.122	126.096	0.481057
	mmu-miR-125a-3p	299.987	100.163	0.333892		mmu-miR-27b-3p	732.815	340.926	0.465228
	mmu-miR-1224-5p	1674.27	514.419	0.307249		mmu-miR-301a-3p	502.636	214.83	0.427407
	mmu-miR-380-3p	61.2538	1	0.0163255		mmu-miR-1224-5p	1633.8	513.724	0.314435
	mmu-miR-467f	61.2538	1	0.0163255		mmu-miR-103-3p	801.399	238.181	0.297207
	mmu-miR-539-5p	61.2538	1	0.0163255		mmu-miR-23a-3p	9293.6	1732.65	0.186435
	mmu-miR-467c-5p	62.8244	1	0.0159174		mmu-miR-27a-3p	10683.1	1956.82	0.183169
	mmu-miR-714	65.9656	1	0.0151594		mmu-miR-221-3p	2241.66	368.947	0.164586
	mmu-miR-489-3p	92.666	1	0.0107914		mmu-miR-24-3p	3130.44	471.692	0.150679
	mmu-miR-2137	102.09	1	0.00979531		mmu-miR-15b-5p	2720.81	368.947	0.135602
	mmu-miR-804	130.361	1	0.00767103		mmu-miR-29b-3p	6290	695.862	0.11063
						mmu-miR-145-5p	95.8297	1	0.0104352
						mmu-miR-208b-3p	96.7692	1	0.0103339
						mmu-miR-340-3p	101.467	1	0.00985545
						mmu-miR-365-3p	114.62	1	0.0087245
						mmu-miR-423-3p	116.499	1	0.00858378
						mmu-miR-1983	127.773	1	0.00782639
						mmu-miR-185-5p	136.228	1	0.00734061
						mmu-miR-2137	146.563	1	0.006823
						mmu-miR-362-3p	148.442	1	0.00673664
						mmu-miR-484	178.506	1	0.00560205
						mmu-miR-152-3p	186.022	1	0.0053757
						mmu-miR-714	205.752	1	0.00486022
						mmu-miR-107-3p	232.058	1	0.00430927
						mmu-miR-324-5p	248.03	1	0.00403178
						mmu-miR-148b-3p	368.287	1	0.00271528
						mmu-miR-350-3p	636.985	1	0.00156989
						mmu-miR-762	701.811	1	0.00142488
	FC- Fold Change

## Sheet: Table S8
Table S8. microRNAs up (A) or downregulated (B) at 4 or 24 h post-stimulus with TcES (MTcES).
(A)	microRNA upregulated in MTcES
	4 h post-stimulus					24 h post-stimulus
	Normalized counts			FC		Normalized counts			FC
				(compared to M0)					(compared to M0)
	microRNAs	M0	MTcES	MTcES		microRNAs	M0	MTcES	MTcES
	mmu-miR-421-3p	1	102.597	102.597		mmu-miR-421-3p	1	93.6684	93.6684
	mmu-miR-714	65.9656	211.301	3.2032		mmu-miR-362-5p	1	77.4893	77.4893
	mmu-miR-484	130.361	306.415	2.35052		mmu-miR-1929-5p	1	74.9347	74.9347
	mmu-miR-350-3p	248.156	550.848	2.21976
	mmu-miR-148b-3p	155.49	333.44	2.14444
	mmu-miR-125a-3p	299.987	638.789	2.12939
	mmu-miR-191-5p	281.139	596.04	2.12009
	mmu-miR-30b-5p	763.317	1593.92	2.08815
	mmu-miR-103-3p	406.788	843.983	2.07475
	FC- Fold Change
(B)	microRNA downregulated in MTcES
	4 h post-stimulus					24 h post-stimulus
	Normalized counts			FC		Normalized counts			FC
				(compared to M0)					(compared to M0)
	microRNAs	M0	MTcES	MTcES		microRNAs	M0	MTcES	MTcES
	mmu-miR-190b-5p	1909.86	870.853	0.455977		mmu-miR-743b-5p	98.6482	1	0.010137
	mmu-miR-1955-5p	1851.75	791.463	0.427413		mmu-miR-2134	120.257	1	0.00831554
	mmu-miR-664-3p	964.355	381.075	0.39516		mmu-miR-1949	124.015	1	0.00806355
	mmu-miR-380-3p	61.2538	1	0.0163255		mmu-miR-2137	146.563	1	0.006823
	mmu-miR-539-5p	61.2538	1	0.0163255
	mmu-miR-467c-5p	62.8244	1	0.0159174
	mmu-miR-1193-3p	65.9656	1	0.0151594
	mmu-miR-199a-3p	73.8187	1	0.0135467
	mmu-miR-383-5p	75.3893	1	0.0132645
	mmu-miR-489-3p	92.666	1	0.0107914
	mmu-miR-1953	97.3778	1	0.0102693
	mmu-miR-743a-3p	125.649	1	0.00795869
	mmu-miR-410-3p	130.361	1	0.00767103
	mmu-miR-1933-5p	207.321	1	0.00482345
	FC- Fold Change

## Sheet: Table S9
Table S9. microRNAs up (A) or downregulated (B) at 4 (left) or 24 h (right) post-stimulus with TcES+LPS (MTcES+LPS).
(A)	microRNA upregulated in MTcES+LPS
	4 h post-stimulus					24 h post-stimulus
	Normalized counts			FC		Normalized counts			FC
				(compared to M0)					(compared to M0)
	microRNA	M0	MTcES+LPS	MTcES+LPS		microRNA	M0	MTcES+LPS	MTcES+LPS
	mmu-miR-155-5p	1	676.18	676.18		mmu-miR-155-5p	1	4272.74	4272.74
	mmu-miR-546	1	112.836	112.836		mmu-miR-210-3p	1	285.388	285.388
	mmu-miR-128-3p	1	88.9011	88.9011		mmu-miR-674-5p	1	171.632	171.632
	mmu-miR-421-3p	1	84.3421	84.3421		mmu-miR-331-3p	1	127.726	127.726
	mmu-miR-331-3p	1	74.0843	74.0843		mmu-miR-7a-5p	1	109.764	109.764
	mmu-miR-484	130.361	341.629	2.62064		mmu-miR-574-3p	1	96.7923	96.7923
	mmu-miR-191-5p	281.139	690.693	2.45677		mmu-miR-467a-5p	1	92.8008	92.8008
	mmu-miR-30b-5p	763.317	1864.64	2.44282		mmu-miR-1929-5p	1	88.8094	88.8094
	mmu-miR-99b-5p	61.2538	147.029	2.40032		mmu-miR-489-3p	1	87.8115	87.8115
	mmu-miR-148b-3p	155.49	360.163	2.31631		mmu-miR-139-5p	1	83.8201	83.8201
	mmu-miR-221-3p	1821.91	4164.68	2.28589		mmu-miR-539-5p	1	81.8244	81.8244
	mmu-miR-146a-5p	2586.8	5369.4	2.0757		mmu-miR-1839-3p	1	81.8244	81.8244
	mmu-miR-103-3p	406.788	840.002	2.06496		mmu-miR-362-5p	1	80.8265	80.8265
	mmu-miR-24-3p	1597.31	3280.22	2.05359		mmu-miR-200b-3p	1	79.8287	79.8287
	mmu-miR-29b-3p	2831.81	5796.81	2.04703		mmu-miR-125a-5p	588.131	4260.86	7.24474
						mmu-miR-1902	545.853	2486.66	4.55555
						mmu-miR-146a-5p	4196.78	17577.3	4.18828
						mmu-miR-101b-3p	175.688	721.452	4.10644
						mmu-miR-222-3p	682.082	2609.4	3.82564
						mmu-miR-99b-5p	143.744	535.85	3.7278
						mmu-let-7e-5p	532.7	1374.05	2.57941
						mmu-miR-377-3p	75.1605	193.585	2.57562
						mmu-miR-30e-5p	96.7692	236.492	2.44388
						mmu-miR-376a-3p	300.642	705.486	2.3466
						mmu-miR-484	178.506	413.328	2.31548
						mmu-let-7i-5p	4783.97	10898.6	2.27815
						mmu-miR-30d-5p	600.345	1352.1	2.2522
						mmu-miR-467f	85.4951	179.615	2.10088
	FC- Fold Change
(B)	microRNA downexpressed in MTcES+LPS
	4 h post-stimulus					24 h post-stimulus
	Normalized counts			FC		Normalized counts			FC
				(compared to M0)					(compared to M0)
	microRNA	M0	MTcES+LPS	MTcES+LPS		microRNA	M0	MTcES+LPS	MTcES+LPS
	mmu-miR-190b-5p	1909.86	934.601	0.489355		mmu-miR-326-3p	286.549	137.704	0.480561
	mmu-miR-1955-5p	1851.75	870.775	0.470244		mmu-miR-361-5p	291.247	97.7901	0.335764
	mmu-miR-1933-5p	207.321	84.3421	0.40682		mmu-miR-27a-3p	10683.1	3369.77	0.315429
	mmu-miR-125a-3p	299.987	108.277	0.360939		mmu-miR-221-3p	2241.66	657.589	0.293349
	mmu-miR-664-3p	964.355	339.648	0.352202		mmu-miR-23a-3p	9293.6	2421.8	0.260588
	mmu-miR-1224-5p	1674.27	577.857	0.34514		mmu-miR-27b-3p	732.815	188.595	0.257357
	mmu-miR-1193-3p	65.9656	1	0.0151594		mmu-miR-762	701.811	158.66	0.226071
	mmu-miR-2137	102.09	1	0.00979531		mmu-miR-1224-5p	1633.8	363.22	0.222316
	mmu-miR-210-3p	105.231	1	0.00950291		mmu-miR-199a-3p	74.221	1	0.0134733
	mmu-miR-804	130.361	1	0.00767103		mmu-miR-145-5p	95.8297	1	0.0104352
						mmu-miR-208b-3p	96.7692	1	0.0103339
						mmu-miR-743b-5p	98.6482	1	0.010137
						mmu-miR-742-3p	101.467	1	0.00985545
						mmu-miR-872-5p	105.225	1	0.00950347
						mmu-miR-2134	120.257	1	0.00831554
						mmu-miR-1949	124.015	1	0.00806355
						mmu-miR-2137	146.563	1	0.006823
						mmu-miR-714	205.752	1	0.00486022
						mmu-miR-2133	223.603	1	0.00447222
	FC- Fold Change

## Sheet: Table S10
Table S10. microRNAs upregulated (≥2-fold change) in BMDM with TcES (MTcES), LPS (MLPS) and TcES+LPS (MTcES+LPS) at both 4 (left) or 24 h (right) post-stimulus.
	Commonly shared microRNA
	4 h										24 h
		Normalized counts					FC					Normalized counts					FC
							(compared to M0)										(compared to M0)
	microRNA	M0	MTcES	MTcES+LPS	MLPS		MTcES	MTcES+LPS	MLPS		microRNA	M0	MTcES	MTcES+LPS	MLPS		MTcES	MTcES+LPS	MLPS
	mmu-miR-15b-5p	984.773	4051.36	3731.57	2465.75		4.11401	3.78927	2.50387		mmu-miR-362-5p	1	77.4893	80.8265	200.819		77.4893	80.8265	200.819
	mmu-miR-107-3p	73.8187	251.607	234.79	197.853		3.40845	3.18063	2.68026		mmu-miR-1929-5p	1	74.9347	88.8094	205.49		74.9347	88.8094	205.49
	mmu-miR-125a-5p	201.038	434.816	608.631	536.677		2.16285	3.02744	2.66953
	mmu-miR-208b-3p	67.5362	173.438	273.542	143.444		2.56807	4.0503	2.12395
	FC- Fold change

[truncated: 3 more sheets: Table S11, Table S12, Table S13]
